# Supplementary material
Source: publisher site journal article supplement (https://www.spandidos-publications.com/7247/downloadSupplementary)

Figure S1. Lack of PD-L1 expression. When CPS=0 indicates PD-L1 expression negativity, no brown staining is observed in tumor cells or immune cells. PD-L1, programmed death-ligand 1.

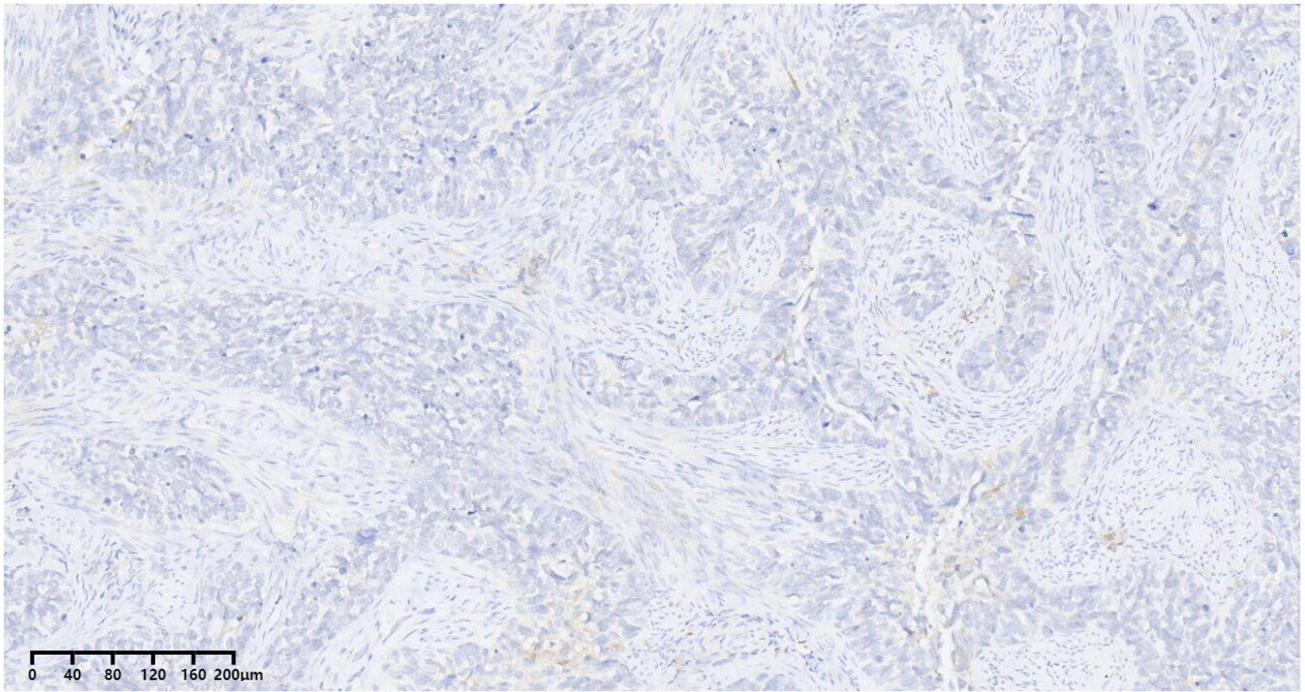

Figure S2. Positive PD-L1 expression. When CPS  $\geq 1$  indicates PD-L1 expression positivity, brown staining can be observed in some tumor cells or immune cells. PD-L1, programmed death-ligand 1.

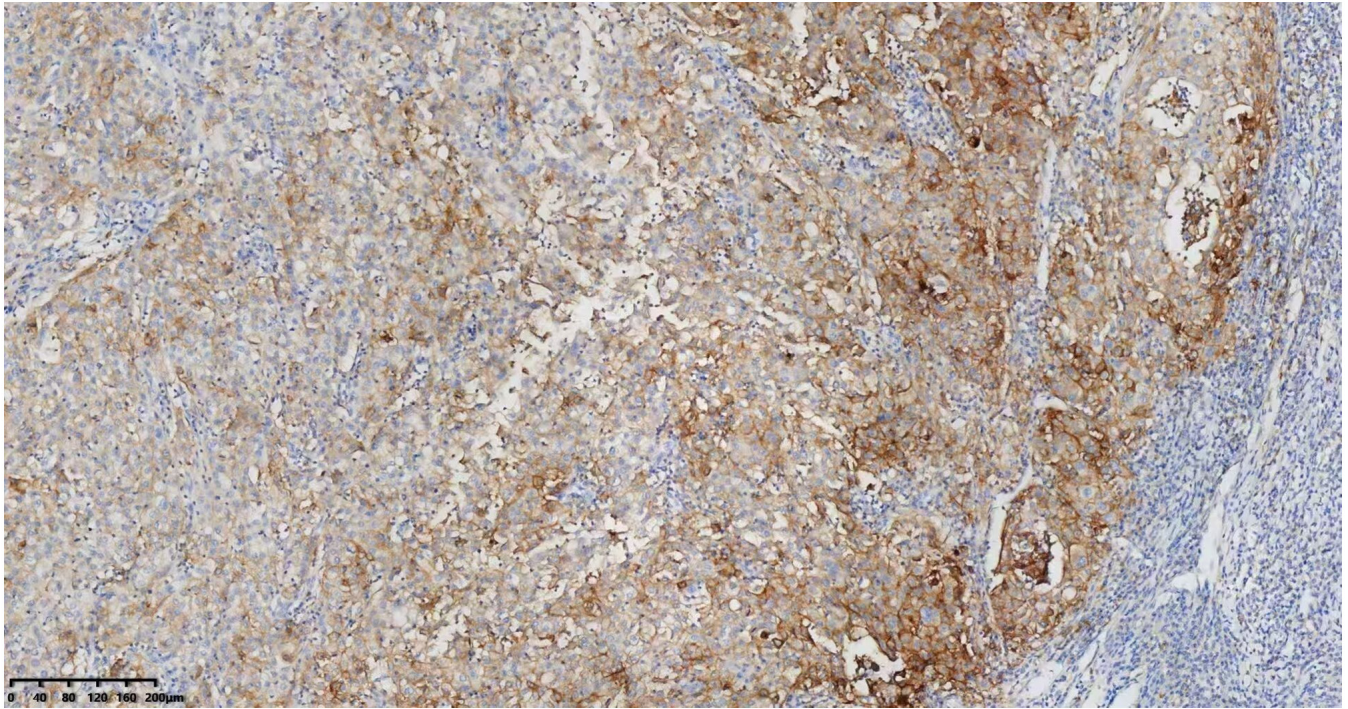

Supplement: Supplementary file 1 [file downloadSupplementary]
